# Supplementary material
Source: PubMed Central journal article supplement (PMC2652151)
Supplement: 2008.159921_1.pdf [file 2008.159921_1.pdf]

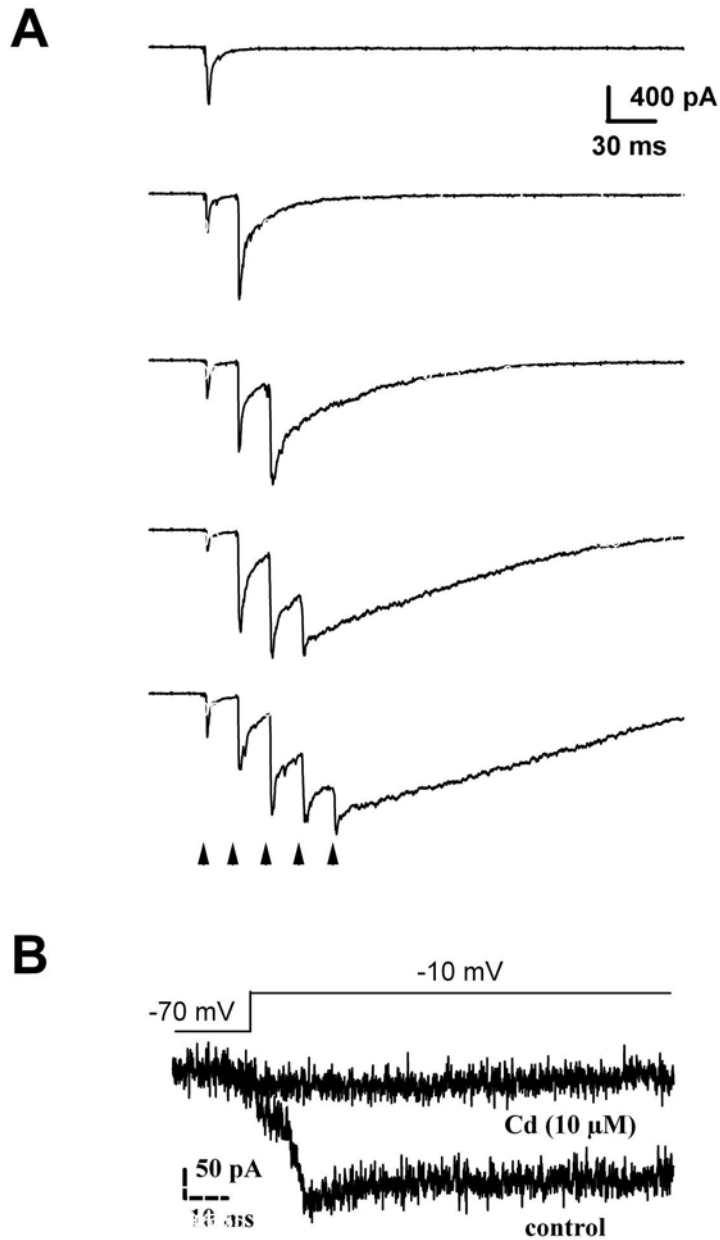

**Supplementary fig. 1**

**A.** MLI EPSCs evoked by parallel fiber stimulation. Whole-cell voltage-clamp recordings from MLI in response to one, two, three, four and five pulses delivered to the parallel fibers at 50 Hz. Recordings were made at -60 mV. Stimulus artifacts are blanked. Arrows denote stimulation time.

**B.** Whole cell current elicited by a depolarization from -70 to -10 mV in a MLI dialyzed with a Cs gluconate -based intracellular solution. Complete inhibition by 10  $\mu$ M Cd within 2 min.

for publication

Rossi et al.  
Supplementary Fig. 1

**A**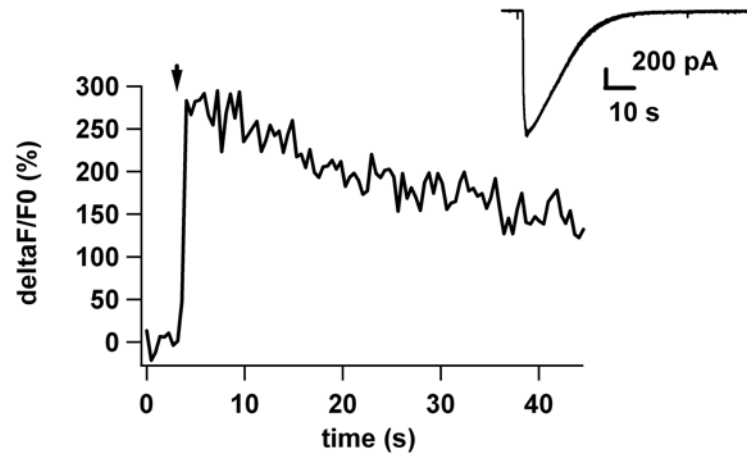**B**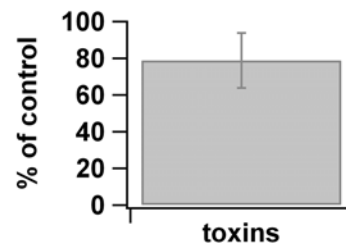**Supplementary fig. 2 : Calcium signals recorded in the presence of VDCCs blockers**

**A.** : Upper graph : time course of  $\Delta F/F_0$  for an axonal hot spot and simultaneous current recording (inset) of the same cell during an AMPA puff in the presence of 200 nM AGAIVA and 500 nM  $\omega$ -Conotoxin.

**B.** Summary of 3 experiments.

for publication

Rossi et al.  
supplementary fig. 2
