# Supplementary material
Source: PubMed Central journal article supplement (PMC2652151)
Supplement: tjp0586-5129-SD1.pdf [file tjp0586-5129-SD1.pdf]

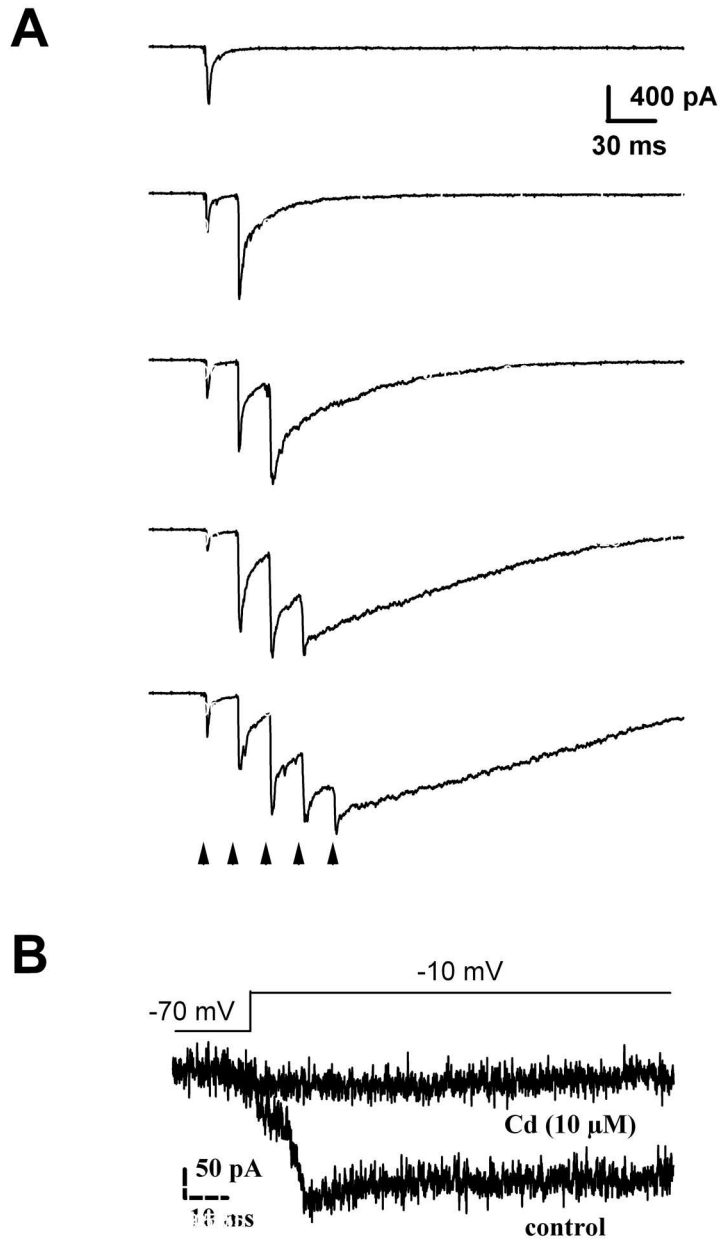

**Supplementary fig. 1**

**A.** MLI EPSCs evoked by parallel fiber stimulation. Whole-cell voltage-clamp recordings from MLI in response to one, two, three, four and five pulses delivered to the parallel fibers at 50 Hz. Recordings were made at -60 mV. Stimulus artifacts are blanked. Arrows denote stimulation time.

**B.** Whole cell current elicited by a depolarization from -70 to -10 mV in a MLI dialyzed with a Cs gluconate -based intracellular solution. Complete inhibition by 10 μM Cd within 2 min.

for publication

Rossi et al.  
Supplementary Fig. 1
