# Supplementary material
Source: PubMed Central journal article supplement (PMC2652151)
Supplement: tjp0586-5129-SD2.pdf [file tjp0586-5129-SD2.pdf]

**A**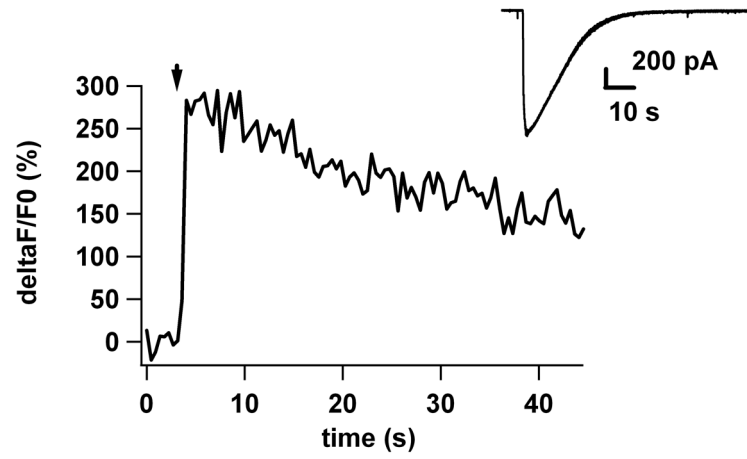**B**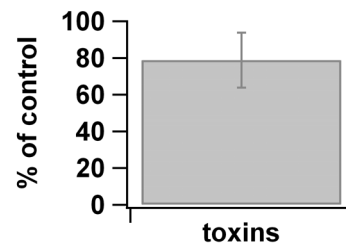**Supplementary fig. 2 : Calcium signals recorded in the presence of VDCCs blockers**

**A.** : Upper graph : time course of  $\Delta F/F_0$  for an axonal hot spot and simultaneous current recording (inset) of the same cell during an AMPA puff in the presence of 200 nM AGAIVA and 500 nM  $\omega$ -Conotoxin.

**B.** Summary of 3 experiments.

for publication

Rossi et al.  
supplementary fig. 2
